# Supplementary material for: The Formation of β-Strand Nine (β9) in the Folding and Insertion of BamA from an Unfolded Form into Lipid Bilayers
Source: MDPI journal article supplement (doi:10.3390/membranes13020247), 2023-02-19
Supplement: s1 [file s1]

## Supplementary Information

**Table S1.** PCR Primers used for site-directed mutagenesis<sup>a</sup>.

| XnC-BamA    | Amino Acid Substitution | PCR Primers <sup>b</sup>                                                                                                          |
|-------------|-------------------------|-----------------------------------------------------------------------------------------------------------------------------------|
| R572C-BamA  | R573C                   | Forward: 5'-CCCGACAGATGGTTCA <b>t</b> GTGTCAACCTGACCG-3'<br>Reverse: 5'-CGGTCAGGTTGACACA <b>Ca</b> TGAACCATCTGTCTGGG-3'           |
| V573C-BamA  | V573C                   | Forward: 5'-CGACAGATGGTTCACGT <b>tg</b> CAACCTGACCGGTAAAG-3'<br>Reverse: 5'-CTTTACCGGTCAGGTT <b>Gca</b> ACGTGAACCATCTGTCTCG-3'    |
| N574C-BamA  | N574C                   | Forward: 5'-CAGATGGTTCACGTGTCT <b>tg</b> CCTGACCGGTAAAGTGACC-3'<br>Reverse: 5'-GGTCACTTTACCGGTCAG <b>Gca</b> GACACGTGAACCATCTG-3' |
| L575C-BamA  | L575C                   | Forward: 5'-GGTTCACGTGTCAAC <b>tg</b> cACCGGTAAAGTGACCATTCC-3'<br>Reverse: 5'-GGAATGGTCACTTTACCGGT <b>gca</b> GTTGACACGTGAACC-3'  |
| T576C -BamA | T576C                   | Forward: 5'-CACGTGTCAACCTGT <b>g</b> CGGTAAAGTGACCATTTCCTG-3'<br>Reverse: 5'-CAGGAATGGTCACTTTACCG <b>ca</b> CAGGTTGACACGTG-3'     |
| G577C-BamA  | G577C                   | Forward: 5'-GTGTCAACCTGAC <b>Ct</b> GTAAAGTGACCATTTCCTGGATC-3'<br>Reverse: 5'-GATCCAGGAATGGTCACTTTACA <b>Ca</b> GGTCAGGTTGACAC-3' |
| K578C-BamA  | K578C                   | Forward: 5'-GTCAACCTGACCGGT <b>tgt</b> GTGACCATTTCCTGGATCG-3'<br>Reverse: 5'-CGATCCAGGAATGGTCAC <b>aca</b> ACCGGTCAGGTTGAC-3'     |
| V579C-BamA  | V579C                   | Forward: 5'-GTCAACCTGACCGGTAA <b>At</b> gcACCATTCCTGGATCGG-3'<br>Reverse: 5'-CCGATCCAGGAATGGT <b>gca</b> TTTACCGGTCAGGTTGAC-3'    |

<sup>a</sup>Mismatched nucleotides for mutagenesis are in bold face.

<sup>b</sup>“Forward” denotes the primer complementary to the 5'–3' DNA strand, “Reverse” the primer complementary to the 3'–5' DNA strand.

Table S2. Analysis of the CD spectra of XnC-BamA mutants in lipid bilayers of *di*C<sub>12</sub>PC<sup>a</sup>

| BamA        | Algorithm | Set | $\alpha$ -helix (%) | $\beta$ -sheet (%) | $\beta$ -turn (%) | Random coil (%) | NRMSD |
|-------------|-----------|-----|---------------------|--------------------|-------------------|-----------------|-------|
| wt-BamA     | CONTIN    | 4   | 16                  | 31                 | 22                | 32              | 0.11  |
|             | CONTIN    | 7   | 16                  | 30                 | 20                | 34              | 0.11  |
|             | CDSSTR    | 4   | 13                  | 33                 | 24                | 31              | 0.01  |
|             | CDSSTR    | 7   | 15                  | 29                 | 21                | 34              | 0.02  |
| R572C-BamA  | CONTIN    | 4   | 16                  | 29                 | 22                | 32              | 0.17  |
|             | CONTIN    | 7   | 16                  | 27                 | 20                | 37              | 0.17  |
|             | CDSSTR    | 4   | 12                  | 34                 | 24                | 30              | 0.02  |
|             | CDSSTR    | 7   | 17                  | 25                 | 22                | 36              | 0.02  |
| V573C-BamA  | CONTIN    | 4   | 17                  | 30                 | 21                | 31              | 0.06  |
|             | CONTIN    | 7   | 17                  | 30                 | 21                | 33              | 0.06  |
|             | CDSSTR    | 4   | 15                  | 32                 | 24                | 30              | 0.01  |
|             | CDSSTR    | 7   | 17                  | 29                 | 21                | 33              | 0.02  |
| N574C-BamA  | CONTIN    | 4   | 16.4                | 31.5               | 20.8              | 31.3            | 0.103 |
|             | CONTIN    | 7   | 16.4                | 31.5               | 20.8              | 31.3            | 0.103 |
|             | CDSSTR    | 4   | 13                  | 32                 | 24                | 31              | 0.015 |
|             | CDSSTR    | 7   | 16                  | 31                 | 22                | 32              | 0.018 |
| L575C-BamA  | CONTIN    | 4   | 18                  | 30                 | 21                | 31              | 0.07  |
|             | CONTIN    | 7   | 18                  | 30                 | 21                | 32              | 0.07  |
|             | CDSSTR    | 4   | 14                  | 30                 | 24                | 31              | 0.02  |
|             | CDSSTR    | 7   | 17                  | 28                 | 22                | 33              | 0.02  |
| T576C-BamA  | CONTIN    | 4   | 17                  | 31                 | 21                | 31              | 0.08  |
|             | CONTIN    | 7   | 17                  | 30                 | 20                | 34              | 0.08  |
|             | CDSSTR    | 4   | 14                  | 30                 | 23                | 31              | 0.01  |
|             | CDSSTR    | 7   | 17                  | 29                 | 20                | 34              | 0.01  |
| G577C-BamA  | CONTIN    | 4   | 16                  | 32                 | 20                | 32              | 0.11  |
|             | CONTIN    | 7   | 16                  | 33                 | 20                | 31              | 0.11  |
|             | CDSSTR    | 4   | 12                  | 32                 | 24                | 31              | 0.02  |
|             | CDSSTR    | 7   | 16                  | 30                 | 21                | 32              | 0.03  |
| K578C -BamA | CONTIN    | 4   | 16                  | 32                 | 21                | 32              | 0.07  |
|             | CONTIN    | 7   | 16                  | 31                 | 20                | 33              | 0.07  |
|             | CDSSTR    | 4   | 13                  | 31                 | 24                | 32              | 0.02  |
|             | CDSSTR    | 7   | 16                  | 29                 | 21                | 34              | 0.02  |
| V579C -BamA | CONTIN    | 4   | 15                  | 33                 | 20                | 32              | 0.11  |
|             | CONTIN    | 7   | 15                  | 32                 | 20                | 33              | 0.11  |
|             | CDSSTR    | 4   | 12                  | 33                 | 24                | 32              | 0.02  |
|             | CDSSTR    | 7   | 16                  | 30                 | 22                | 33              | 0.02  |

<sup>a</sup>After folding into bilayers of *di*C<sub>12</sub>PC, the compositions of the secondary structures of wt-BamA and  $\chi_n$ C-BamA mutants were analyzed from CD spectra using DICHROWEB (see *ref.* [43] and references therein). For analysis, the deconvolution algorithms, CONTIN [41] and CDSSTR [42] were used. These algorithms and the two sets of reference spectra resulted in very similar compositions of the secondary structures of BamA and  $\chi_n$ C-BamA mutants.
